# Supplementary material for: The influence of phthalocyanine aggregation in complexes with CdSe/ZnS quantum dots on the photophysical properties of the complexes
Source: publisher site journal article supplement (doi:10.3762/bjnano.7.94), 2016-07-13
Supplement: Additional file 2 [file 2190-4286-7-94-S2.pdf]

# Supporting Information

for

## **The influence of phthalocyanine aggregation in complexes with CdSe/ZnS quantum dots on the photophysical properties of the complexes**

Irina V. Martynenko<sup>1</sup>, Anna O. Orlova\*<sup>1</sup>, Vladimir G. Maslov<sup>1</sup>, Anatoly V. Fedorov<sup>1</sup>, Kevin Berwick<sup>2</sup> and Alexander V. Baranov<sup>1</sup>

Address: <sup>1</sup> Department of optical physics and modern natural science, ITMO University, 197101 Saint Petersburg, Russia and <sup>2</sup>Department of Electronic and Communications Engineering, Dublin Institute of Technology, Dublin 8, Ireland

Email: Anna Orlova\* - a.o.orlova@gmail.com

\* Corresponding author

### **Derivation of the dependencies of the donor and acceptor concentrations in QD-monomer and QD-aggregate complexes on the relative acceptor concentration**

The dependence of the concentration of donors bonded with acceptors,  $C_d^{bonded}$  on the relative acceptor concentration in the mixture,  $n = C_a / C_d$ , can be easily calculated from the Poisson distribution:

$$P(m) = \frac{n^m}{m!} e^{-n}. \quad (S1)$$

The fraction of bonded donors is defined as:

$$\frac{C_d^{bonded}}{C_d} = \sum_{m=1}^{\infty} P(m) \quad (S2)$$

and the concentration of bonded donors is:

$$C_d^{bonded}(n) = C_d \sum_{m=1}^{\infty} P(m) \quad (S3)$$

Since the parameter  $\alpha$  is the maximum number of acceptor molecules in the complex, where there is no formation of acceptor aggregates, the concentration of donors bonded with acceptor monomers can be defined as a sum of the concentrations of donors bonded with 1, ...,  $\alpha$  acceptor molecules:

$$C_d^M(n, \alpha) = C_d \cdot \sum_{m=1}^{\alpha} P(m). \quad (S4)$$

We can express the dependencies of the concentration of acceptor molecules in both the aggregated and the monomeric forms on the QD surface on  $n$ . Since we assume that the acceptor in monomeric form exists only in complexes, where the maximum number of molecules on the QD surface is equal to  $\alpha$ , the monomer concentration is equal to the sum of the concentration of QD donors bonded with acceptor monomers multiplied by 1, ...,  $\alpha$ , which can be obtained from Equation S4:

$$C_a^M(n, \alpha) = C_d \cdot \sum_{m=1}^{\alpha} P(m)\alpha. \quad (S5)$$

The concentration of the aggregated acceptor molecules can be obtained by subtracting the monomer concentration (Equation S5) from the total acceptor concentration:

$$C_a^A(n, \alpha) = C_a - C_a^M(n, \alpha) = C_a - C_d \cdot \sum_{m=1}^{\alpha} P(m)\alpha \quad (S6)$$
