# Supplementary material for: The influence of phthalocyanine aggregation in complexes with CdSe/ZnS quantum dots on the photophysical properties of the complexes
Source: publisher site journal article supplement (doi:10.3762/bjnano.7.94), 2016-07-13
Supplement: Additional file 3 [file 2190-4286-7-94-S3.pdf]

# Supporting Information

for

## The influence of phthalocyanine aggregation in complexes with CdSe/ZnS quantum dots on the photophysical properties of the complexes

Irina V. Martynenko<sup>1</sup>, Anna O. Orlova\*<sup>1</sup>, Vladimir G. Maslov<sup>1</sup>, Anatoly V. Fedorov<sup>1</sup>, Kevin Berwick<sup>2</sup> and Alexander V. Baranov<sup>1</sup>

Address: <sup>1</sup> Department of optical physics and modern natural science, ITMO University, 197101 Saint Petersburg, Russia and <sup>2</sup>Department of Electronic and Communications Engineering, Dublin Institute of Technology, Dublin 8, Ireland

Email: Anna Orlova\* - a.o.orlova@gmail.com

\* Corresponding author

### Derivation of analytical expressions of PL QY of the acceptor and energy transfer efficiency on $n$ in a heterogeneous system

In the case of a heterogeneous system, we can only measure the total optical density for the acceptors (both monomers and aggregates) as well as just total optical density of bonded donors (i.e. donors bonded with both acceptor aggregates and monomers). So in a heterogeneous system of complexes ensemble-averaged QY of directly excited acceptor PL ( $\varphi_{a,h}^{direct}$ ) and energy transfer efficiency ( $E_h$ ) are defined as:

$$\varphi_{a,h}^{direct} = \frac{I_a^{direct}}{D_a^M + D_a^A} \quad (S1)$$

$$E_h = \frac{I_{a,h}^{sens}}{D_d^M + D_d^A} \cdot \frac{D_a^M + D_a^A}{I_{a,h}^{direct}} \quad (S2)$$

Where  $I_{a,h}^{direct}$  and  $I_{a,h}^{sens}$  are the directly excited and sensitized acceptor PL, respectively, where  $D_a^M$  and  $D_a^A$  are the optical densities of acceptor molecules in monomeric and aggregate forms in complexes, respectively;  $D_d^M$ ,  $D_d^A$  are the optical densities of donors bound with monomers and aggregates respectively.

Optical densities of donors and acceptors in heterogeneous system are simply derived as:

$$\begin{aligned} D_a^M &= C_a^M \varepsilon_a^M l \\ D_a^A &= C_a^A \varepsilon_a^A l \\ D_d^M &= C_d^M \varepsilon_d l \\ D_d^A &= C_d^A \varepsilon_d l \end{aligned} \quad (S3)$$

Where  $C_a^M$ ,  $\varepsilon_a^M$  and  $C_a^A$ ,  $\varepsilon_a^A$  are the concentrations and extinction coefficients of acceptor molecules in monomeric and aggregate forms in complexes, respectively;  $C_d^M$ ,  $C_d^A$  are the concentrations donors bound with monomers and aggregates respectively;  $\varepsilon_d$  is the extinction coefficients of donor,  $l$  is the path length.

Derivation of the dependencies of the donor and acceptor concentrations in QD-monomer and QD-aggregate complexes on the relative acceptor concentration are presented in Supporting Information File 2.

The dependency of the acceptor luminescence intensity on  $n$  can be found by modifying the model by assuming that only acceptors in the QD/monomer complexes contribute to the measured acceptor PL in the heterogeneous system. Therefore, the intensity of the directly excited acceptor PL should be proportional to the monomer optical density at the photoexcitation wavelengths:

$$I_{a,h}^{direct}(\lambda_{exc}) \sim I_0 \cdot \varphi \cdot D_a^M = I_0 \cdot \varphi_0 \cdot \varepsilon_a^M(\lambda_{exc}) \cdot C_a^M \cdot l, \quad (S4)$$

where  $I_0$  is the intensity of the exciting radiation;  $\varepsilon_a^M(\lambda_{exc})$  is the acceptor monomer extinction coefficient at the wavelength of PL excitation  $\lambda_{exc}$ ;  $\varphi_0$  is the PL quantum yield of monomers and  $C_a^M$  is the concentration of acceptor monomer.

Combining Equation S1 with Equation S3 and Equation S4 gives:

$$\varphi_{a,h}^{direct}(n, \alpha) \sim \frac{I_a^{direct}}{D_a^M + D_a^A} = \varphi_0 \frac{\varepsilon_a^M C_a^M}{\varepsilon_a^M C_a^M + \varepsilon_a^A C_a^A} = \varphi_0 \frac{\sum_{m=1}^{\alpha} P(m) \alpha}{\sum_{m=1}^{\alpha} P(m) \alpha + \frac{\varepsilon_a^A}{\varepsilon_a^M} (n - \sum_{m=1}^{\alpha} P(m) \alpha)} \quad (S5)$$

For a heterogeneous system of complexes, the intensity of the sensitized acceptor PL depends on the concentration of donors bound to monomers. It is also necessary to take into account the variation of the  $\varphi_{a,h}^{direct}$  value with  $n$  accordingly to Equation S5:

$$I_{a,h}^{sens}(\lambda_{exc}) \sim I_0 \cdot \varepsilon_d(\lambda_{exc}) \cdot E(m) \cdot \varphi_{a,h}^{direct} \cdot C_d^M \cdot I, \quad (S6)$$

where  $\varepsilon_d(\lambda_{exc})$  is the donor extinction coefficient at the wavelength of PL excitation  $\lambda_{exc}$ ;  $E(m)$  is FRET efficiency in complex of quantum dot donor with  $m$  independent acceptor monomers.

Combining Equation S2 with Equation S3 and Equation S5 gives:

$$E_h(n, \alpha) = \frac{I_{a,h}^{sens}}{D_d^M + D_d^A} \cdot \frac{D_a^M + D_a^A}{I_{a,h}^{direct}} \sim E_{obs} \frac{C_d^M}{C_d^{bonded}} = E_{obs} \frac{\sum_{m=1}^{\alpha} P(m)}{\sum_{m=1}^{\infty} P(m)} \quad (S7)$$
