# Supplementary material for: The influence of phthalocyanine aggregation in complexes with CdSe/ZnS quantum dots on the photophysical properties of the complexes
Source: publisher site journal article supplement (doi:10.3762/bjnano.7.94), 2016-07-13
Supplement: Additional file 4 [file 2190-4286-7-94-S4.pdf]

# Supporting Information

for

## **The influence of phthalocyanine aggregation in complexes with CdSe/ZnS quantum dots on the photophysical properties of the complexes**

Irina V. Martynenko<sup>1</sup>, Anna O. Orlova\*<sup>1</sup>, Vladimir G. Maslov<sup>1</sup>, Anatoly V. Fedorov<sup>1</sup>, Kevin Berwick<sup>2</sup> and Alexander V. Baranov<sup>1</sup>

Address: <sup>1</sup> Department of optical physics and modern natural science, ITMO University, 197101 Saint Petersburg, Russia and <sup>2</sup>Department of Electronic and Communications Engineering, Dublin Institute of Technology, Dublin 8, Ireland

Email: Anna Orlova\* - a.o.orlova@gmail.com

\* Corresponding author

### **Estimation of the extinction coefficients of the PcS<sub>z</sub> molecules in monomeric and aggregated states**

Figure S2 shows UV–vis absorption spectra of the PcS<sub>z</sub> and QD solutions, which were used for the estimation of the extinction coefficients of the PcS<sub>z</sub> molecules in monomeric and aggregated forms.

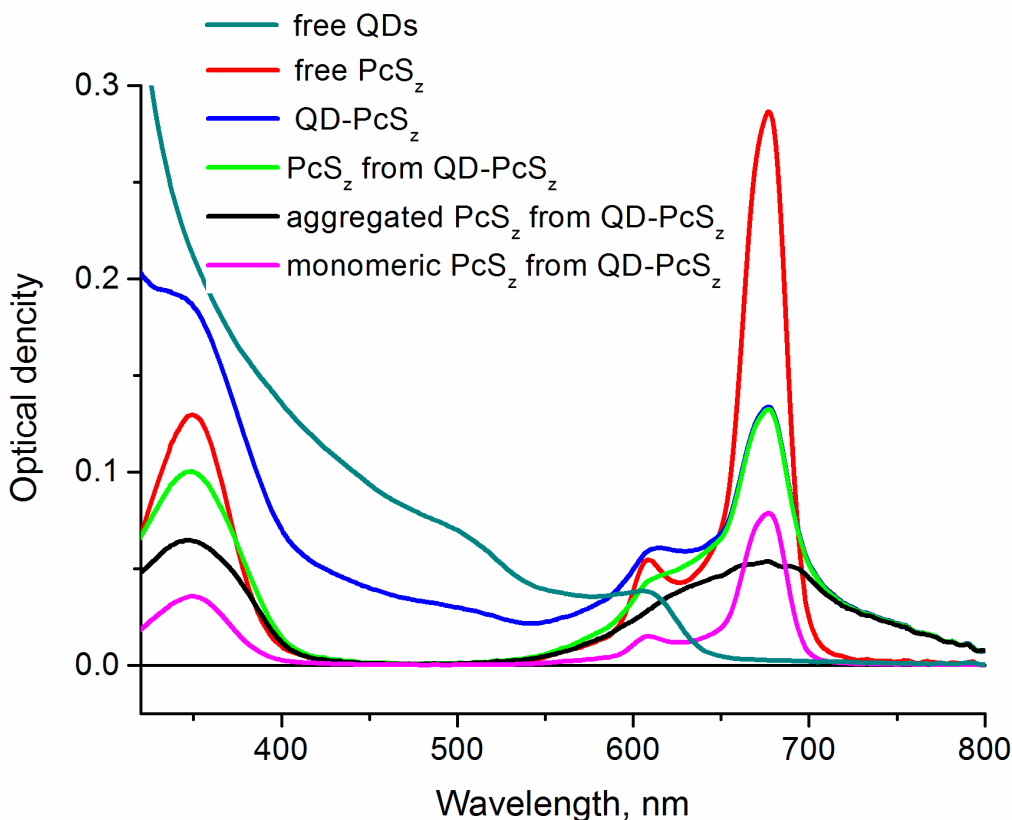

**Figure S2:** UV–vis absorption spectra of the PcS<sub>2</sub> and QD solutions under study.

Complexes of quantum dots with phthalocyanine molecules with a high relative concentration of PcS<sub>2</sub>,  $n \sim 50$ , were produced by the addition of the stock QD solution to the free PcS<sub>2</sub> solution.

Analysis of the absorption spectrum of the mixture solution (blue curve, Figure S2) revealed PcS<sub>2</sub> aggregation in the complexes with QDs. A decrease in the intensities of the Pc Soret band (350 nm) and the Q band (675 nm), as well as the appearance of the dimer band at 644 nm, were observed.

An absorption spectrum of the PcS<sub>2</sub> in complexes with QDs (green curve) was obtained as a result of subtracting the QD absorption spectrum from the QD/PcS<sub>2</sub> mixture absorption spectrum. The absorption spectrum of aggregates (black curve, Figure S2) was derived after subtracting the contribution of the monomeric PcS<sub>2</sub> (pink curve, Figure S2) to the absorption spectrum of the PcS<sub>2</sub> in the complexes with QDs.

Using a value for the monomeric PcS<sub>2</sub> extinction coefficient of  $1.75 \times 10^5 \text{ mol}^{-1}\text{cm}^2$  for the Q band, the total PcS<sub>2</sub> concentration  $C_a$  and PcS<sub>2</sub> monomer concentration  $C_a^M$  were calculated from the free PcS<sub>2</sub> (red curve, Figure S2) and monomeric PcS<sub>2</sub> (pink curve, Figure S2) optical densities according to the Beer–Lambert law.

The concentration of the aggregated PcS<sub>z</sub> molecules  $C_a^A$  was calculated from mass balance:

$$C_a^A = C_a - C_a^M. \quad (S1)$$

The extinction coefficients of the PcS<sub>z</sub> molecules in monomeric and aggregate forms were calculated for direct PcS<sub>z</sub> photoexcitation at a wavelength of 640 nm.

The data obtained are listed in Table S1.

**Table S1:** Concentrations and extinction coefficients of monomeric and aggregated PcS<sub>z</sub> in the complexes with QDs.

|                                                       |                                |
|-------------------------------------------------------|--------------------------------|
| $C_a$ , $\mu\text{mol/L}$                             | $1.64 \pm 0.08$                |
| $C_a^M$ , $\mu\text{mol/L}$                           | $0.45 \pm 0.018$               |
| $C_a^A$ , $\mu\text{mol/L}$                           | $1.19 \pm 0.047$               |
| $\varepsilon_a^M(640)$ , $\text{mol}^{-1}\text{cm}^2$ | $(3.167 \pm 0.13) \times 10^4$ |
| $\varepsilon_a^A(640)$ , $\text{mol}^{-1}\text{cm}^2$ | $(3.64 \pm 0.14) \times 10^4$  |

The ratio of the extinction coefficients of PcS<sub>z</sub> molecules in aggregate and monomeric forms  $\varepsilon_a^A / \varepsilon_a^M$  was found to be 1.15 for PcS<sub>z</sub> photoexcitation at a wavelength of 640 nm.
